# Supplementary material
Source: publisher figshare collection journal article supplement (https://karger.figshare.com/ndownloader/files/12926687)
Supplement: Supplementary file 1 [file 12926687]

**Accelerated pubertal tempo in a 46,XY aromatase-deficient patient**

Costanzo Mariana 1, Garcia-Feyling José3, Saraco Nora1,2, Marino Roxana1, Pérez Garrido Natalia1, Touzon Maria Sol1, Viterbo Gisela1, Lazzati Juan Manuel1, Patiño Hellem Carolina1, Mattone Celeste1, Maceiras Mercedes1, Belgorosky Alicia1, 2, Guercio Gabriela 1,2

1 Servicio de Endocrinología, Hospital de Pediatría Garrahan, Buenos

Aires, Argentina

2 Consejo Nacional de Investigaciones Científicas y Técnicas (CONICET), Argentina

3 Hospital Regional de Concepción, Tucumán, Argentina

Corresponding Author: Alicia Belgorosky, MD, PhD. Servicio de Endocrinología, Hospital de Pediatría Garrahan, Combate. de los Pozos 1881, Buenos Aires, Argentina. C1245AAM. e-mail: [abelgo12345@gmail.com](mailto:abelgo12345@gmail.com). Phone: +5441143080034/Fax: +541143085325


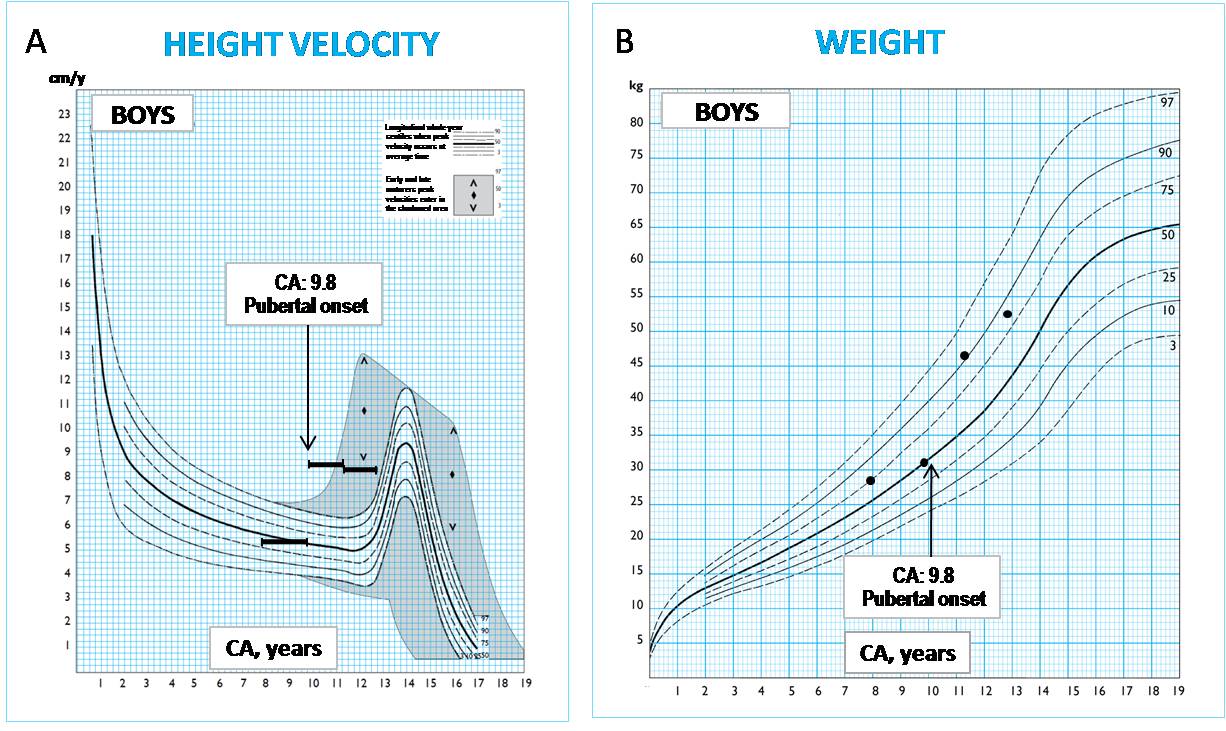


**Supplementary Figure 1A** Height velocity chart (International references, 43) **1B** Weight chart (Argentinian references, 43). CA: chronological age. The onset of puberty is highlighted in boxes.
